# Supplementary material for: Prenatal Diagnosis of Congenital Heart Diseases and Associations with Serum Biomarkers of Aneuploidy: A Multicenter Prospective Cohort Study
Source: PubMed Central journal article supplement — Yonsei Med J. 2022 Jul 19;63(8):735–43. doi: 10.3349/ymj.2022.63.8.735 (PMC9344277; doi:10.3349/ymj.2022.63.8.735), 2022-07-19
Supplement: ymj-63-735-s001.pdf [file ymj-63-735-s001.pdf]

**Supplementary Table 1.** Combined Abnormalities of Critical Congenital Heart Defects in the Study Population

| No | CHD                           | Other congenial malformation | Chromosomal abnormality                               | Prenatal suspicion      | Birth outcome     |
|----|-------------------------------|------------------------------|-------------------------------------------------------|-------------------------|-------------------|
| 1  | HLHS                          | Cystic hygroma               | Trisomy 21                                            | HLHS                    | Termination (18w) |
| 2  | HLHS                          | DIV                          | Normal                                                | HLHS, CoA, DIV          | Live birth        |
| 3  | HLHS                          | Not identified               | Normal                                                | HLHS                    | Stillbirth (21w)  |
| 4  | AVSD                          | CDH                          | Trisomy 18                                            | AVSD                    | Termination (23w) |
| 5  | AVSD                          | CDH                          | 46,XY,r(15)(p11.2q26.1)[44]<br>/45,XY,-15[5]/46,XY[1] | AVSD, Aortic stenosis   | Termination (17w) |
| 6  | AVSD                          | No                           | Trisomy 21                                            | AVSD                    | Live birth        |
| 7  | AVSD                          | Not identified               | Not identified                                        | AVSD                    | F/u loss          |
| 8  | DORV                          | Mesenteric cyst              | Not identified                                        | DORV                    | F/u loss          |
| 9  | DORV                          | Not identified               | Trisomy 21                                            | DORV or TOF             | F/u loss          |
| 10 | DORV                          | ASD, VSD                     | Normal                                                | DORV                    | Live birth        |
| 11 | DORV                          | Not identified               | Normal                                                | DORV,                   | F/u loss          |
| 12 | TGA                           | ASD                          | Normal                                                | TGA, VSD                | Live birth        |
| 13 | TGA                           | Not identified               | Not available                                         | TGA, VSD                | F/u loss          |
| 14 | TOF                           | No                           | Normal                                                | TOF                     | Live birth        |
| 15 | TOF                           | No                           | Normal                                                | TOF                     | Live birth        |
| 16 | TOF                           | No                           | Normal                                                | Normal                  | Live birth        |
| 17 | TOF                           | Not identified               | Normal                                                | TOF                     | f/u loss          |
| 18 | TOF                           | CDH                          | Normal                                                | TOF                     | Live birth        |
| 19 | PAVSD                         | Thymic aplasia               | Normal                                                | PAVSD                   | F/u loss          |
| 20 | PAIVS                         | No                           | Normal                                                | PAIVS                   | Live birth        |
| 21 | Ebstein anomaly               | Not identified               | Trisomy 18                                            | Ebstein anomaly         | Stillbirth (23w)  |
| 22 | Interrupted aortic arch       | Not identified               | Normal                                                | Interrupted Aortic arch | Live birth        |
| 23 | Aortopulmonary septal defects | Choledochal cyst             | Angelman syndrome                                     | VSD                     | Live birth        |
| 24 | Situs inversus                | Not identified               | Normal                                                | Situs inversus,         | F/u loss          |
| 25 | Situs inversus                | Not identified               | Normal                                                | Situs inversus          | Live birth        |
| 26 | TAPVR                         | ASD                          | Normal                                                | Portocaval shunt        | Live birth        |
| 27 | PS                            | ASD                          | Normal                                                | Normal                  | Live birth        |
| 28 | PS                            | VSD, club foot               | Normal                                                | PAVSD                   | Live birth        |
| 29 | PS                            | ASD                          | Normal                                                | Normal                  | Live birth        |
| 30 | PS                            | No                           | Normal                                                | Normal                  | Live birth        |
| 31 | MS                            | TS                           | Normal                                                | Normal                  | Live birth        |
| 32 | Rhabdomyoma                   | No                           | Normal                                                | Rhabdomyoma             | Live birth        |
| 33 | Ectopia cordis                | Omphalocele                  | Normal                                                | Ectopia cordis          | Abortion (15w)    |
| 34 | Cardiomegaly                  | ACC                          | Normal                                                | Cardiomegaly            | Stillbirth (21w)  |
| 35 | Cardiomegaly                  | Facial cleft                 | 46,XY,der(4)t(2;4)(p22;p15.3)                         | Cardiomegaly            | Abortion (16w)    |

CHD, congenital heart disease; HLHS, hypoplastic left heart syndrome; w, weeks; DIV, double inlet ventricle; CoA, coarctation of aorta; AVSD, atrioventricular septal defect; CDH, congenital diaphragmatic hernia; DORV, double outlet right ventricle; TOF, tetralogy of Fallot; ASD, atrial septal defect; VSD, ventricular septal defect; TGA, transposition of the great arteries; NIPT, non-invasive prenatal test; PAVSD, pulmonary atresia with ventricular septal defect; PAIVS, pulmonary atresia with intact ventricular septum; TAPVR, total anomalous pulmonary venous return; PS, pulmonary stenosis; MS, mitral stenosis; TS, tricuspid stenosis; ACC, agenesis of corpus callosum.
